# Supplementary material for: A full year of continuous net soil and ditch CO 2 , CH 4 , N 2 O fluxes, soil hydrology and meteorology for a drained fen in Denmark
Source: Copernicus journal article supplement (doi:10.5194/essd-2025-123), 2025-03-25
Supplement: Supplementary file [file essd-2025-123-AC1-supplement.pdf]

## Detailed replies to reviewer comments/questions

### Reviewer #1 Daniel Epron

With their manuscript, the authors would like to share a full year of data on greenhouse gas fluxes from soil and ditch in a drained fen in Denmark. This is really kind of them, especially since the dataset appears to be of very good quality and obtaining it must have involved both financial and human effort. It is highly respectable, but surprising (for me at least) that they don't seek to promote it with a conventional article before sharing it with the rest of the community. I am not used to reviewing data papers and hope my comments will be helpful nonetheless. [Author: Thank you for the kind words.](#)

I have only one major concern related to the discarded data. Discarding non-significant regressions as explained line 238 is a problem. If the flux is almost 0, the slope is also almost 0 and the regression, by nature, is non-significant. If a significant number of low fluxes were discarded, then means and cumulated fluxes used for annual budget in Table 3 for example are over estimated (in absolute value). Similarly, “wrong windows” (lines 251-259) can be repositioned. Of course, this takes time, but it is worth doing.

[Author: We fully agree with the concern of the reviewer here and from the current text our methods of discarding noisy and low fluxes can be misunderstood. We did not use R<sup>2</sup> as a parameter to determine fluxes, but instead used RMSE, g-factor and the relative error of the slope \(SE/slope\) as outlined in lines 227-235. We have reformulated the text in lines 238 to clarify that these low fluxes were discarded as it was not possible to visibly detect whether there was a flux or it was because the chamber had malfunctioned. Therefore, discarding these doubtful fluxes is a conservative approach, as including erroneous small fluxes would also bias the means and cumulated fluxes. The new text in lines 311-315 emphasizes this: “At low flux levels non-significant fluxes were discarded as it was not possible to visibly detect whether there was a flux due to high noise-signal ratio of the analyser and/or it was because the chamber had malfunctioned. It is acknowledged that discarding low fluxes can bias annual means and cumulative values, but the data quality did not allow us to determine whether the flux measurement was performed correctly and hence a conservative approach was chosen as including false low fluxes would also bias the data set.”](#)

[Regarding the “wrong windows”. Unfortunately, it is prohibitive in terms of time \(resources\) to refit “wrong windows” as this will have to be done manually, specifically by identifying these individual flux measurements in the millions of lines of data \(in total we have around 31000000 lines of data for each gas\). It is our assessment that we will only gain a few percent added data coverage which does not stand against the excessive resources we will spend time wise. We have improved the detection of fluxes in our new deployments of the SkyLine based on these experiences described here.](#)

### Minor comments

L25: replace by “flux was more dynamics” [Author: Done](#)

L43: “changes” (plural) [Author: Done](#)

L59: explain why night-time fluxes are expected to be overestimated [Author: we added the following text: “due to atmospheric stratification that disturbs the steady-state diffusion gradient between soil and the atmosphere”. We prefer to keep it to this simple explanation as](#)

going in to depths with a physical explanation is unnecessary in our view. The paper by Brændholt et al. 2017 explains this excellent.

L166: provide the length of the long tube (important that the colleagues that will work with these data understand well how it was measured) Author: the lengths of the tube in the ditch and the collar on top has been added to the text

L166: “On the top” is duplicated. Remove one. Author: Done

L173: clarify “thus” and the link between “net flux” and weed killing Authors: We agree that the current explanation to this important disturbance was inadequately described. We have expanded on this section of the paper as it has also been pointed out by reviewers 2 and 3 as important to explain. We have included the timing of the glyphosate application prior to flux measurements, a notion of the half life of glyphosate and explained the plant removal in more detail. We have changed the paragraph now in lines 134-139: “Plant removal from collars is considered a common practice to isolate net soil GHG fluxes as the aboveground autotrophic respiration is removed. Since the individual collars were not trenched it is unavoidable to include belowground autotrophic respiration from plants growing adjacent to the collars. To avoid excessive disturbance of the site we did not remove these roots.”

L241: Use “annual cumulated fluxes” instead of “annual budget” Author: Done

Fig 9,10: thicker green line will be appreciated Author: Done

L345: was -> were Author: Done

Fig 11, 18B, 18C: a horizontal line at intercept 0 will help Author: Done

Section 3.6 seems oddly structured, starting with the annual cumulated fluxes, followed by individual measures (5 per day) and then the monthly sum Author: we understand the concern of the reviewer. However, our idea was here to organize the section into; spatial, temporal (daily, monthly) and then finishing with annual cumulated fluxes. We understand that this will lead to a certain overlap in data representation, especially between 3.6.1 and 3.6.4. We would prefer to keep this organization as we do not think it impedes the interpretation of data. Also, both R2 and R3 did not point to this organization.

## Reviewer #2 Judith Vogt

I would like to thank the authors for compiling this extensive dataset and corresponding manuscript. I think the dataset could be very valuable to the research community. Before publication, I think both the dataset and the manuscript need revision. [Author: Thank you for the positive reply.](#)

### General comments:

The structure and content of the manuscript reflect that of a classic research article, but the authors chose ESSD for publication. Given the focus on datasets in ESSD, I strongly recommend to revise the datasets to make them easy-to-use and comprehensive for potential users.

I find a bit concerning that the site experienced different levels of disturbance and wonder if that may affect the potential for modelers to use this data? Some discussion could be added in the manuscript, and possibly convincing arguments why this dataset would still be valuable for further use in models and experiments. [Author: This is a valid concern and is shared by R1 and R3. We realize that our initial description was too vague and we have added missing details on the glyphosate addition and vegetation removal in section 2.6.1.](#)

Generally, the impact of this study could be emphasized further and throughout the manuscript. Some more in-depth analysis would be nice regarding annual budgets of the site, and driving factors of GHG fluxes, for example, with correlation analyses or similar. [Author: It was never our intention with this paper to test hypothesis or infer potential causal relationships to environmental drivers, but to publish the dataset. We trust that the dataset holds many possibilities for alternative analyses, e.g. time series analyses, correlation/statistical modeling, biogeochemical model test/development. We consider the publication of the data set as service to the community to focus future potential publications/studies on focused use of data for analyses without tedious description of the entire methodological setup. Regarding the impact of the study for wider peatland biogeochemical research, the data is confined to one site which, by definition, limits its broader representativeness. We wish to refrain from performing correlation analyses of driving factors as this would increase the length of the manuscript considerably and require to refocus the entire manuscripts towards hypothesis driven approach.](#)

### Dataset:

- I would recommend to use csv files rather than excel if the data is meant to be broadly used. [Author: this is a good suggestion and we will change the data format to CSV if the revised version of the manuscript is accepted for publication.](#)

- Were the measurements split up in different files because of varying temporal resolutions (I don't see the need to separate them by figure)? If so, it might make sense to leave them in separate files. In that case, please use uniform column names, e.g. TIMESTAMP instead of Date, DateTime or Time and avoid several columns with the same name. Otherwise, it would also be nice to have all information in a single file, or at least have one file with flux measurements and accompanying WTD, etc. [Author: We understand the value of merging flux values with hydrological and climatological data. However, as pointed out here by the reviewer the data files were split due to different temporal resolutions of the different data types. We appreciate the reviewer can see the sensibility in maintaining split files based on measured parameters and we](#)

have accordingly streamlined the Date, DateTime, Time to one common name – **TIMESTAMP** – as suggested.

- I would recommend to give latitude and longitude of the locations in each file. An indication whether the collar is soil or ditch might also be helpful as well as any other indicators that show differences among the collars (maybe elevation?). **Author:** We are unsure of the value of adding lon/lat + elevation for each collar in the data files as this will increase the size and complexity of the data files and would therefore like to refrain from adding this information. Instead, we made the file “VB SkyLine2D transect Figure 3.xlsx” to contain general information of the placement of the transect, that can be easily cross referenced with the collar number in data files, but we also now realize that the exact lon/lat position of each collar is missing in this file as pointed out. We have added the lon/lat information in the “VB SkyLine2D transect Figure 3.xlsx” in columns O, P file as well as indicated whether it is peat or ditch. The elevation in meters above sea level is already provided in column P of the current “VB SkyLine2D transect Figure 3.xlsx” file.

- I don’t see the ebullition fluxes in the dataset. Please clarify how they are reflected in the CH4 column and ideally split up into diffusion and ebullition. **Author:** We assume you refer to the file “VB GHG fluxes Figures 9 - 15.xlsx”. In column D, F and H of the file is indicated whether the flux was calculated as HM: Hutchinson-Mosier (non-linear), LM: linear regression or as ebullition. Section 2.7 and 2.8 details the calculation of diffusive (HM and LM models) and ebullition fluxes, respectively.

Specific comments:

Abstract:

- Especially in the abstract and introduction, I suggest to clarify the directions of fluxes, e.g. “soil-atmosphere/ditch-atmosphere fluxes” and “emissions/source to the atmosphere”. **Author:** We agree that the language regarding the fluxes and distinction between soil and ditch in the abstract was unclear and we have clarified. In the first paragraph of the introduction we have added more detail on the net emission/uptake in relation to GHG fluxes and the relation to net emission/sink of atmospheric GHGs.

- note that the doi of the dataset should be given in the abstract for ESSD **Author:** Done

- add numbers of average fluxes for CH4 and N2O as is done for CO2, and add standard deviations or similar **Authors:** numbers of CH4 and N2O are already mentioned in the abstract (e.g. 42515 and 44099, respectively). We have added average CO2, CH4 and N2O for all soil and ditch fluxes.

l. 26: replace “lead” with “led” **Author:** Done

l. 27: clarify what is meant by annual budget – N2O or GHG budget? **Author:** clarified as “annual net budget of soil N2O”

l. 30: remove “with expectations” **Author:** Done

Introduction:

- since it is suggested to use this dataset for models, it might be worth to search the literature and include a paragraph about how/why this dataset is currently lacking and would be a valuable addition to the modelling realm [Author: we have expanded on the need for this dataset in the introduction](#)

- the second paragraph only mentions a single measurement unit. It might be worth to mention a few others and make the advantages of the system used in this study a bit clearer. [Author: we added mentioning of the Eosense eosAC-LT/LO system, deploying different chamber designs than LiCOR.](#)

- two paragraphs of the introduction focus on processing methods, although I don't think that is part of the main points of this manuscript. Therefore, I would recommend to shift the focus a bit and make the impact of this manuscript a bit clearer. [Author: We agree that we do not discuss the implications of different data processing on fluxes in the manuscript and we only use one approach with the goFlux script. We reduced these two paragraphs to one and expanded on the impact of our data set in a broader context in the last paragraph. We like to refrain from excessive speculation regarding fluxes for this particular site to environmental drivers as this is an explicitly stated aim of why we publish to paper that we seek collaboration with other researchers to achieve this deeper insight. We truly believe that sharing the data in this way will advance the interpretation.](#)

- in the Methods you describe that the site went through a chain of disturbances/changes which likely affect GHG fluxes. Therefore, this should definitely be made clearer in the introduction as well. [Author: We are not entirely sure if the reviewer here means 1\) the initial disturbances of cutting, application of glyphosate and continued aboveground plant removal or 2\) the rewetting that have taken place at the site. However, we believe the reviewer refers to the initial plant disturbances and have expanded on the description of this by adding text on how the initial harvesting, subsequent application of glyphosate and continuous removal of vegetation throughout the measurement periods in lines 120-139 where we also discuss how this may have impacted fluxes and what our approach presents of limitations towards establishing a true net ecosystem GHG budget. We are fully aware of the limitations with our setup and believe they are communicated, but currently there are no ideal chamber systems that can measure the full GHG balance without presenting some level of disturbance.](#)

l. 48: add "a", i.e. allow for a standard number of... [Author: Done](#)

l. 65: in Figure 3, the distance is 30 m, not 24 m – please revise. [Author: In the caption for Figure 3 it is stated that the transect with the collars is 24 meters long and visually it is shown that the distance between the towers is 30 meters. This is also described in lines 190-191.](#)

Materials and Methods:

l. 73: add "in Denmark" and the latitude/longitude of the site [Author: done](#)

l. 79: replace "makes out" with "forms" [Author: Done](#)

l. 86/Figure 1: The scale bar on the lower left is not visible. [Author: Figure 1 has been updated](#)

- l. 90/Figure 2: This figure could be shifted to the appendix or be removed. [Author: Figure 2 has now been moved to Figure S1](#)
- l. 93/Figure 3: Lines and text not visible very well, please increase size and visibility, e.g. by adding white background to black text. “30 m” could be red for clarification. [Author: the figure has been updated to improve readability](#)
- l. 95-97: unclear what the JB numbers are without reference [Author: this reference has been removed as it was irrelevant and a section on peat soil characteristics has been added as per request of R3 \(lines 143 – 161\). The JB numbers refer to a specific Danish soil classification for agricultural soils.](#)
- l. 98: yet another transect length is given. Please stick to one throughout. [Author: sorry for the confusion. It was a left over from earlier. The length of 24 meter is now used consistently](#)
- l. 99: specify analyser, e.g. “greenhouse gas analyser”? [Author: we have streamlined the wording regarding analyser and mentioned GHG before analyser throughout the manuscript.](#)
- l. 100-101: does the elevation refer to above sea level? Please specify. Remove repetition of “along the transect/across the transect”. [Author: clarified](#)
- l. 102: replace “an N-S” with “a north-south” [Author: done](#)
- l. 103: briefly mention what the SkyLine2D system is, add a reference or manufacturer [Author: done](#)
- l. 104: clarify whether the the pallet tanks were simply used to stabilize the system [Author: this has now been clarified](#)
- l. 109: replace “was” with “were” and remove repetition of “along the transect” [Author: done](#)
- l. 110: replace “farmer’s field” with “agricultural field” [Author: done](#)
- l. 118-119/Figure 4: The peat depth is not indicated in the figure, so I think the last sentence in the caption could be removed. [Author: done](#)
- l. 120: I don’t find the section heading “Data variables” fitting here since the variables are not clearly presented, but it is rather described how they were measured as would be done in the Methods section of a classic research article. [Author: we have given this section a new title “Overview of time series of GHG fluxes, soil temperature/moisture, air temperature, wind direction and groundwater level”. We would prefer to keep this table](#)
- l. 121: inconsistency with length of dataset – previously it was 12 months, now 13. [Author: yes, this is a mistake. This has now been clarified both in the text and table 1.](#)
- l. 123: Please indicate whether there was any snow cover during the study period at some point in the manuscript. [Author: there was a shorter period between December, 7<sup>th</sup> and 19<sup>th</sup>, but the depth was not estimated. This information has been added.](#)

l. 124: revise dates to include a comma between day and year and stick to the same date format throughout the manuscript (also in caption of Figure 12, for example) [Author: done](#)

l. 127/Table 1: The last column is missing a header – should it be “Data availability” or similar? The footnote 2 could be mistaken with exponent 2 – maybe consider choosing a different character such as asterisks instead. [Author: we have clarified that the columns containing 2021, 2022 and 2023 mark data availability of the listed variables in the caption and by adding a top row to the table with the word “Data availability”](#)

l. 133-135: Worth mentioning here that these measurements were only conducted at specific collars. [Author: done](#)

l. 143: replace “collecting” with “measuring” [Author: done](#)

l. 154-160: While I don’t think section 2.5 is essential for the manuscript, it may be helpful for others in the research community. As a note, links should include the date of last access and abbreviations should be explained (such as SigFox). [Authors: We agree that this is marginal informative, but it can be helpful if people want to replicate to know the reference. The names LoRaWAN and SigFox are standard names for these protocols and as such are not abbreviations.](#)

l. 161: I think section 2.6 should come earlier in the manuscript since the SkyLine2D system has already been mentioned several times before without further explanation. Also, the distinction into subsections 2.6.1-2.6.3 does not seem overly helpful and they could be merged into one since they all describe the measurement setup. Note that at the beginning of a sentence, numbers should be spelled out. A little restructuring of section 2.6 might help to chronologically answer the questions: What was measured and why? How were things measured? I think some information is very detailed (e.g. some data processing steps in l. 219-226) and could be moved to the appendix to shorten this section a bit and focus on the most relevant information. [Author: We agree the SkyLine2D concept should be introduced earlier which is why we have moved some of the text from 2.6 to the site description – see lines 184 - 210. We merged sections 2.6.1 to 2.6.3 in to one section 2.6 to improve readability, but maintain the argument of including it in the main manuscript as it is the GHG flux methods that is at the heart of creating a high quality data set. Similarly, with sections 2.7 and 2.8 detailing the flux calculations. We think this is needed in a data descriptor paper to fully describe how the data was created. In this case it relies heavily on the measurement system \(2.6\) and how the resultant data was processed to fluxes \(2.7 and 2.8\). It is too rare that scientific papers take the time to fully explain the technical details in flux measurement and system design. Here we believe we have an opportunity to do this, so subsequent papers do not need to go through the same tedious details. We therefore argue to maintain the level of detail as a service to the user of these data.](#)

l. 169: replace “hit” with “sat on” – does this mean that if the water level was low, air could have entered through the holes? [Author: corrected. The holes in the pipe in the ditch were placed lower than the minimal observed water level in the ditch. This information has been added in section 2.6 first paragraph.](#)

l. 170-173: I think it would be worth to dedicate a subsection to summarize all the disturbances

the site faced for clarification. Was the addition of Glyphosate done to reflect common agricultural practices? Or rather to get the true soil flux? Could this treatment have affected GHGs? Author: We agree with this suggestion and we have added in the site description a comprehensive description and discussion (lines 106-139) of the main disturbances on the site, e.g. glyphosate addition and plant removal. It is here detailed that we could not, because of chamber dimensions, include aboveground living plants as they grow too big here. Therefore, our strategy was to focus on net soil fluxes, which necessitated removing vegetation initially and continuously. In this text we also acknowledge the drawback of these practices. However, they are routinely practiced in chamber flux research due to inherent limitations of the technique to represent the entire ecosystem. We acknowledge this and argue that our study is on the mechanisms of soil GHG dynamics rather than the net ecosystem exchange for which inclusion of plants is needed.

l. 185-189: I think this could be removed or are these variables relevant and given in the dataset? Author: Agree and we removed the text.

l. 190/Figure 5: This is a nice figure – make sure all text and numbers are visible. I think it could be moved to the appendix since it shows details of the measurement setup. Author: agree. This figure is now Figure S2

l. 206: replace “hz” with “Hz” Author: done

l. 207: The precisions seem to be for 5-minute intervals? If so, please indicate. Author: done

l. 214: remove quotation marks Author: done

l. 215: sentence could be removed Author: removed

l. 217: remove “the procedure outlined in” Author: done

l. 218: I think this sentence could be removed, or correct to “converted to micromole per mole” Author: removed and replaced with the unit of the fluxes for CO<sub>2</sub>, CH<sub>4</sub> and N<sub>2</sub>O

l. 228 and 233: Why “at time zero”? The slope would cover a range of timesteps. Author: for the HM calculation the slope is time dependent, e.g. you want to estimate the pre-deployment flux. The flux at time zero is the best estimate for this flux. This has been the convention since the HM paper was published. For the LM the slope is time-independent and hence represents the pre-deployment flux.

l. 237: How were you able to detect mechanical malfunction? Author: There are built-in features in the SkyLine ensuring the system to stop running when it encounters mechanical anomalies, for example due to that the chamber did not lower or raise properly or that the trolley missed the end stop. This is to avoid damage to the equipment. This has been clarified now

l. 238: What do you mean by “non-significant”? Is this based on a p-value? Please indicate. If low fluxes were generally removed, does that mean that you overestimate fluxes? Author: Agree, this was unclear and in fact incorrect. R1 asked a similar question. We refer you to comment #2 to R1.



l. 241-246: I am surprised that this simple approach to estimate annual budgets was chosen with this high-resolution dataset. Was there a reason why the daily values were not summed over the year instead of taking an average? At least a few different estimates using different simple methods to determine annual budgets could be presented. In my opinion, this point could be a strength of this manuscript and would make the data more comparable with other studies. [Author: We fully agree that performing more detailed analyses on interpolation and timeseries analyses would be possible and indeed relevant here. We decided to limit data interpretation here as we want to do this in collaboration with other researchers and in follow up studies. The argument being that interpolation and time series analyses could be an entire study in itself. We would therefore inadvertently end up excluding relevant methods should we choose different ones, as suggested here. We therefore, for the sake of simplicity chose to present the most conservative annual estimate, which was multiplying the average flux with 365 days. We truly believe that expanding collaborative potential with this open dataset will increase the impact beyond what could be done in one manuscript provided the extensive nature of the dataset.](#)

l. 247/Figure 6: This figure should be moved to the appendix together with the following text in l. 253-261. As a modeler (which seems to be the main target group here), I might not be super interested in how exactly you processed the data, but want to see the clean data presented. [Author: we have tried to reformulate so it appears already in the introduction that the data set is made available for both experimentalists and modelers, without favouring one group over the other. For the sake of length we agree that this detailed figure is better suited as a supplementary figure.](#)

l. 263: Instead of “Ebullition, e.g. mass flow of CH<sub>4</sub>” I suggest “Methane ebullition flux” [Author: done](#)

l. 268 and 269: replace “enclosure-1” by “per enclosure” and clarify if you refer to a time or space component here – do you refer to 5 min? Please clarify. [Author: done](#)

l. 270: Equation 1 results in units nmol \* 1e-6 \* m<sup>-2</sup>, so I think 1e-6 should be removed? [Author: done](#)

l. 275: It is unclear how often ebullition was detected from the ditch, so the frequency remains unknown. Would it not be adequate to extrapolate ebullition fluxes throughout the day based on the measurements? Or is that what was done? Please clarify and elaborate. [Author: we have now added in lines 339-346 the frequency of detected ebullition events and how this was used to extrapolate to an annual estimate. First, ebullitions represent the flux over a 5 minute flux measurement time as it is the accumulated CH<sub>4</sub> that counts. Ebullitions were detected in 334 out of a total of 1728 flux measurements from the ditch, e.g. 19.3% of the time. At the same time it can be assumed that the diffusive fluxes remain, so they are present 100% of the time. So to extrapolate to an annual estimate we estimated the number of 5 minute enclosures in the duration of the study period \(360 days\) where ebullitions were detected \(19.3%\). This gives a number of 5 min enclosures of 2049 for 360 days. This is multiplied with the average ebullition flux and summarized to g CH<sub>4</sub> m<sup>-2</sup>.](#)

l. 278-279: suggest to remove sentence [Author: done](#)

l. 279-284: I don't understand this, please clarify. I'm also not sure whether upscaling is the right term here or if you refer to extrapolation? Does this mean that there were 2 actual out of 5 potentially measured ebullition events? And therefore, for 3 out of 5 measurements, the ebullition flux was zero? If so, those should be considered too. Were there any measurements where you were able to determine both diffusive and ebullition fluxes? Was the concentration burst only observed for CH<sub>4</sub> or also CO<sub>2</sub>? [Authors: We appreciate this comment and after having reviewed the text we do realize it was actually presented wrong. CO<sub>2</sub> did not show ebullition behaviour as CH<sub>4</sub>. We have changed the text \(line 338-348\) and only explained how we extrapolate to an annual estimate considering the frequency of ebullitions to diffusive fluxes:](#)

[“Out of a total of 1728 flux measurements from the ditch \(collar 10\), 334 were classified as ebullitions indicating that ebullition was erratic which is in line with studies of ebullition of fluxes from ponds \(Wik et al. 2016; Sørensen et al. 2023\). Hence, it can be assumed that ebullition occurred around 19.3% of the time during the measurement period \(360 days\). Furthermore, the ebullition flux is calculated as the accumulated CH<sub>4</sub> in the chamber headspace during the entire flux measurement, e.g. 5 minutes here \(Sørensen et al. 2023\), and the calculated ebullition flux in the data set is therefore representative of 5 minute enclosure and not per second. To extrapolate to an annual estimate the number of 5 minute enclosures in 19% of 360 days is therefore estimated \( \$N=20049 \text{ 5-min } 360 \text{ days}^{-1}\$ \), multiplied with the average ebullition flux \( \$\text{nmol CH}\_4 \text{ m}^{-2} \text{ 5 min}^{-1}\$ \).](#)

[Ebullitions could also be caused by mechanical disturbance of the chamber landing on the collar. Ebullition fluxes were discarded if the sudden increase in CH<sub>4</sub> headspace concentration \(Fig. S4\) occurred 30 seconds after recorded chamber closure as this indicated bubbles released by chamber deployment on top of the collar.”](#)

Figure 7: Again, I think this should be placed in the appendix. [Author: Agree. Figure 7 is now Figure S3](#)

Data presentation:

l. 300 and 312: I don't think wind climate is a common term. Wind regime could be used for example. [Author: changed to wind regime](#)

l. 301: replace “max” with “maximum” [Author: done](#)

l. 301-303: A pattern is not super clear in Figure 8, so maybe best to remove this sentence? [Author: done](#)

l. 307-308: Sentence does not seem very meaningful, so it could be removed. [Author: done](#)

l. 311/Figure 8: In panel A, how can the maximum speed be lower than the mean? Also, error bars for the mean should be inserted. In panel B, reconsider the legend of the color palette. Only blue colors are visible in the wind rose. [Authors: the gust wind speed is shown on the right y-axis. However, we have decided to remove panel A, as it is less relevant than the wind rose diagram.](#)

l. 323/Figures 9-12: Consider showing the times of GHG measurements with shaded areas

spanning the y axis instead of lines on the x axis. Could the x axis ticks be improved to show each first of the month for example? Same comments apply to the following timeseries figures. Author: done. For figure 11 the WTD measurements corresponded to the measurement period of GHG fluxes. We have improved the ticks for the figures.

L. 327: Sentence is very vague. Seasonal variation in temperature is typical, not only in Denmark. One could either elaborate more on this, or remove the sentence. Author: done

L. 329-331: rephrase to “Monthly ranges of air temperatures (Tab. 2) show >20°C variation between minimum and maximum, except for February, pointing towards large diurnal variations.” Author: done

L. 333-335/Table 2: Usually, the mean alongside the standard deviation would be given or standard error, for example. Please add that. Author: adding the standard deviation/SE is in our opinion for this specific table not more informative than having the max and min values of the shown variables. I would assume the reviewer wants the SDEV to provide a measure of variability around the mean. We think that having the max/min values achieves this in a more transparent way. fWe therefore suggest to keep the current design.

L. 339/Figure 10: What is the message of this figure? The soil temperatures would be expected to be very similar along the transect, unless there are clear differences between the locations. It is a bit unclear whether any of the sensors could for example be below the groundwater level at any point. One could show one figure instead that shows the overall seasonal cycle of temperature for all collars combined. Also, the numbers of collars are not consistent with those given in Table 1 for soil temperature measurements, collars 1 and 18 are missing. Is there a reason for that? Add legends for the line colors in the plots. The different blue colors in panels A-E are difficult to distinguish, please choose others. Author: The point was to show they are similar and yes, this is to be expected. However, we agree that this figure may be excessive and we have merged the soil temperature data in to one graph and added it to figure 5 as panel B.

L. 347-349: Is this information relevant for this study? Author: text has been modified to make it less repetitive.

L. 356/Figure 11: If the overall water table depth for the site is to be presented, then the figure does not necessarily help much, since the elevation of each collar is different. Figure 4 does a better job. Maybe the authors could clarify the main message of this figure. Is it relevant or would it fit better in the appendix? Also, it would be worth to insert a horizontal line at depth 0. Author: this figure shows the water table depth relative to the surface and not the hydraulic head. We find it relevant to present the finer details in the temporal variability of WTD and not the overall variation as shown in figure 4. So we would like to keep it in the main manuscript.

L. 394: Here and throughout the manuscript, mean fluxes should always be accompanied by an error estimate, such as standard deviation. Authors: standard error values have now been added

L. 396: I think there may be little spatial variation until the start of summer, but after that, most sites take up methane, while some emit. Can the moisture or water level be considered as drivers for methane at this site then? Author: we have added the sentence “The low spatial and

similar temporal variation between collars indicate the both hydrological indicators of SWC and WTD are poor predictors of CH<sub>4</sub> fluxes at this site.”

l. 402: maybe microbes played a role here? Author: yes, evidently, microbes are the main producers of CO<sub>2</sub> in this soil, since the majority of plant derived CO<sub>2</sub> is avoided, but the microbial activity is only moderated by WTD and the spatial variability in WTD does not seem to be able to predict spatial patterns of CO<sub>2</sub>.

l. 404-406: is there any information available about nutrient content in soils? Author: as per the request of R3 we have added a section in the Data presentation data on soil and groundwater chemistry. We refer to these specific comments below.

l. 407/Figure 14: This figure is a very nice visualization of the study. Consider replacing Figure 4 with Figure 14 to avoid repetition. Author: thank you. We have removed figure 4 and 14 and it is now Figure 3.

l. 426-428 and 430-431: a bit awkwardly phrased sentences, consider to rephrase slightly for better understanding. Author: we have tried to improve the language of this text in lines 481-491.

l. 436: This is the first time in this section that results were discussed and compared with those from other studies. I definitely miss a bit more discussion in this manuscript. Please add references and discussion for the other gases as well. Author: We have deleted this sentence where the hotspots have been compared to a temperate forest and replaced the citation with a more relevant article from a temperate peatland (Anthony and Silver 2023). Again, we want to reiterate that this paper is not intended for discussion of mechanisms, but to present that data. We believe that we are limited by space to fully discuss in depth the hot moments aspects of the N<sub>2</sub>O, but have provided tantalizing evidence that this is a major driver here.

l. 439/Figure 16: Small text on right side of the figure to indicate months is barely visible. Author: We have updated the figure to make the text on the right side bigger

l. 443: Maybe better to state “we observed a clear diurnal cycle” or similar. Author: done

l. 444-446: Split up or rephrase sentence to avoid long chain of information. Author: done

l. 450/Figure 17: What is shown here? Are the fluxes averaged across collars and then summed? Is WTD also averaged across collars? If they are identical for subplots A-C, then there is no need to show it 3 times. Please revise and clarify in the caption. Authors: It is now stated that soil collar fluxes were average and summed to monthly site sums. In the caption it is stated that the WTD is also site average. We prefer to keep the WTD curve for panels A-C to more clearly relate the WTD and temperature dynamics to all gases.

l. 456: The relation could be shown explicitly in a correlation matrix or plot. In Figure 17, the relation is not clear. Author: we prefer not to perform correlation analyses as we think this necessitates a reframing of the entire manuscript away from the data description. We have modified the wording of this sentence (line 552-556).

l. 459 and following: Please make sure there is no repetition of this information. It might make

sense to restructure or comprise section 3.6 a bit to avoid repetition. Author: In line 557-565 we have now explicitly mentioned CO<sub>2</sub> and N<sub>2</sub>O and therefore these sentences regarding CH<sub>4</sub> are descriptive of its temporal variability. We prefer to keep it as, in our opinion, it does not repeat information.

L. 474/Figure 18: Is it possible to partition the diffusive and ebullition CH<sub>4</sub> fluxes (considering your methodology) to see whether the higher CH<sub>4</sub> fluxes result from ebullition? Please add horizontal lines at zero. Author: In the data file in the repository the diffusive and ebullition fluxes are separated and hence it is possible to partition the contribution. This is explicitly done in the monthly and annual sums, but here we prefer to show the total CH<sub>4</sub> emission per day. Horizontal lines have been added.

L. 480: Please be more precise about the frequency/occurrence of ebullition at the ditch. How often did it occur? What was the magnitude of the fluxes? And how does this compare to diffusion? Author: we have added the frequency of ebullition measurements and its average contribution to CH<sub>4</sub> emissions.

L. 502: Worth mentioning that ebullition fluxes are very sporadic and that there is no clear temporal pattern to be expected. Author: a sentence has been added in line 607-608 including two relevant references.

L. 511-512: The figure reference “(Fig. 19D)” should probably follow after “zero”, and reference to Figure 18C could be added at the end of the sentence. Author: done

L. 514/Figure 20: Please add horizontal line for zero or add shaded area or similar. Done?

L. 519: Is the proportionality based on visual inspection of Figure 20? Author: We have deleted the wording proportionality. Yes, it was based on visual interpretation.

L. 546-547: I think a reference is needed here when referring to NO<sub>3</sub><sup>-</sup> measurements which are not presented in this study. Author: as mentioned earlier. A new section in Data presentation is added showing NO<sub>3</sub><sup>-</sup> data in groundwater as per request of R3.

L. 554-555: Might be worth to elaborate on this. Author: We believe we have addressed this already in lines 571-586.

L. 559/Table 3: Footnote about GWP can be removed since the info is given in the table caption. Why is the 20-year GWP given only for the ditch? What are the numbers in parenthesis for the ditch GWP for CO<sub>2</sub> and N<sub>2</sub>O? What are the numbers in squared brackets? It could be worth to add further estimates based on different approaches here, as indicated in earlier comments. Consider using <1 or similar for peat soil CH<sub>4</sub> GWP since it is not equal to 0. Could the fluxes also be given as area-weighted (in addition to per-m<sup>2</sup>) fluxes if the area of peat soil and the ditch is known? Author: The numbers in brackets were for the GWP<sub>20</sub>, but we decided to remove all mentioning of global warming in the table since it is less relevant for this manuscript and because we lack the net ecosystem exchange of CO<sub>2</sub>. Also, we would like to refrain from providing an area upscaled GHG estimate since the fluxes here only represent a smaller area of the entire peatland at Vejrumbro. Regarding the other interpolated annual estimates: as per our argument earlier we here present the most conservative estimate possible.

## Conclusion:

Please list limitations of the study and answer the questions: Would the budgets in a different year likely be the same? What effects does the disturbance history of the site have on the measured parameters? I. e. is the data representative in time and among temperate fens?

Author: We have added a sentence mentioning that this dataset is only to be viewed as being representative of the period as other climatic and hydrological conditions in other years will lead to different fluxes (lines 650-652).

We have also added a summary paragraph on the effect and limitations of the disturbances we made at the site (lines 653-661).

The text in lines 662-664 states the comparison to other studies, which has also been outlined in the text (lines 472-480).

## Supplement:

It is unclear which plot belongs to which collar. Please indicate. Also, why was collar 10/the ditch excluded? Author: collar 10 was excluded here as the groundwater data could not be represented as depth below terrain. Hence a graphical streamlining with the soil plots was not possible. Also, the timeseries of ditch GHG emissions is included now as figure 18. However, the ditch water temperature has not been presented, but is included in the data repository file "VB groundwater depth Figure 6.xlsx". We judge this as a minor issue and would like to keep the supplementary figures of collars 1-27 (excluding 10) as it is. We have detailed which plot belongs to which collar and explicitly stated that it is only for soil collars.

### Reviewer #3 Ko van Huissteden

This data paper is a useful contribution to the study of soil greenhouse gas fluxes in peatlands, because it presents data from a novel system of automatic chamber greenhouse gas measurements covering a transect with a large number of collars, a relatively high data frequency and a full year coverage. However, I have two serious objections to this paper that should be addressed properly before final publication. Therefore I recommend publication, but with major revisions. My main objections are:

1. A lack of ancillary soil and vegetation data. There is practically no data on soil and vegetation included, except for a short mentioning of peat soil. Neither it is clear which of the cited references gives adequate information on soil conditions of the transect. If these data are to be used by other researchers on ecosystem greenhouse gas fluxes, one would at least expect a basic description of a soil profiles at the site, or a borehole transect, and some basic soil and water chemistry data.

Author: we have added new sections 2.1.2 Peat soil characteristics (lines 143-161) and description of water sampling in lines 162-175 2.1.3 Groundwater water sampling and chemical analysis and in section 3.6 Groundwater chemistry (lines 414-446) (+new figure 8). In these new sections we present the methodology of soil and groundwater sampling and describe magnitude and trends. This data has now also been included it in the published dataset. Since vegetation was removed and we did not excavate roots we do not have vegetation data.

2. The measurement procedure, that entails removal of vegetation. The procedure of removal of vegetation has been common in the past but is increasingly abolished because of the intense intertwining of vegetation, microbial community and soil processes that generate greenhouse gas fluxes. Removal of vegetation (including the application of herbicide in this case) is a large disturbance of this system, with questionable results. It introduces artefacts that are poorly quantified for CO<sub>2</sub> fluxes since labile carbon pools in the soil are affected.

In the case of CH<sub>4</sub> fluxes, the main supply of labile carbon for methanogens is reduced, and the main transport pathway of CH<sub>4</sub> from soil to atmosphere (by plant aerenchyma) is destroyed. Therefore it likely leads to much lower fluxes of CH<sub>4</sub> compared to those in an undisturbed system, resulting in data that cannot be compared to those of other sites – if not simply flawed. For details, see the comments below.

The authors should state clearly in the abstract that vegetation removal has been applied. Furthermore, they should discuss properly what effects this may have had on the fluxes that they have measured.

Even if this is a data paper only, reflection on the complexity of the system that you have measured, and on the effects of your measurements on that system, is necessary.

Author: Thank you for this comment and the concerns you raise are shared with R2. We have included more text on the potential effects of glyphosate addition and vegetation removal in lines 120-139. We fully acknowledge that plant removal is suboptimal, but with the current chamber setup it was a necessity to be able to measure the fluxes. The limitations of plant removal have been mentioned now and it is stated in the conclusion that these data do not represent net ecosystem exchange data and that especially CH<sub>4</sub> fluxes may be biased because of the role of the plants. Visual inspection at the site confirmed that there is considerable lateral root growth underneath the soil collars from adjacent vegetation as we only removed vegetation



from a 40x40 cm area around each collar (now detailed in description of plant removal). Hence, it is likely that plant derived C and N substrates for methanogens and N cycling microbes could be present in the soil under the collars. However, we did not excavate roots during the study to avoid excessive disturbance.

You are right that the artefacts that are introduced are unknown and difficult to quantify. Since we did not have an undisturbed control we cannot quantify the disturbance effect, but only discuss potential biases it might have introduced. We think also it is fair to say that all chamber based systems have biases and are essentially impacting the system they measure on. Only eddy covariance can be considered truly non-invasive.

Minor comments concern mostly the quality of figures and their captions, and questions on the operation of the automatic chamber system.

#### **Detailed comments on the paper.**

Section 2.1 Site description: This is disappointingly incomplete. Not any information is given on the soil profile and its lateral variation along the transect, while this could have been checked with a few hand augerings. What is the peat stratigraphy, are there any sand or clay layers in between or on top of the peat? What is the peat type, its decomposition grade, loss on ignition? Any information about soil water chemistry, for instance the presence of anaerobic electron acceptors that influence the redox potential and methanogenesis? What is the variation of the vegetation along the transect? *Juncus effusus* and most grasses differ strongly in the characteristics of their root system and methane transport characteristics. All this is information that any user of your data would want to know.

Author: Thank you for this helpful comment. We realize now that this important site information was missing and we have now added these descriptive data under the Site description section of the paper. See also comment above regarding this.

Line 94 – 101, caption Fig. 3: What are the instruments in the lower right corner of the figure?

Author: they are automated chambers measuring light and dark fluxes of CO<sub>2</sub> and CH<sub>4</sub> on *Juncus* and reed canary grass plots. These instruments belong to another research project.

Figure 4: The figure is not very informative (except on the surface topography and placement of the collars) and the caption is confusing. The vertical profile has two colours, brown and dark grey, which suggests some sort of stratigraphy. However, the brown colour is marked as 'transect surface', but apparently it indicates the soil above the minimum water table depth. The lower depth of the peat is not indicated. Information on the peat properties and its variability (e.g. the presence of clay/sand layers) is lacking. This would be very useful information for users of the data. Author: we agree that the use of brown color and blue shaded area can be misleading. Now that we have included peat soil characteristics prior to this figure we only show the transect surface, with the collars, piezometer locations indicated as well as the mean, max and min WTD. As per suggestion from R2 the original Fig. 14 and Fig. 4 and is now Fig. 3 was merged and Fig. 14 was deleted. We would like to maintain this overview figure of the transect as we believe it is informative for the reader to understand how the transect was configured and instrumented.

Line 170 – 173:

This procedure of killing vegetation by harvesting, and application of a herbicide, attempts to reduce the effects of vegetation respiration and to measure the 'true' or 'net' soil GHG flux.



However, it introduces other artefacts that are poorly quantified, in particular for the CH<sub>4</sub> fluxes. For measuring of CO<sub>2</sub> fluxes from the soil it often has been done with the purpose of reducing CO<sub>2</sub> respiration/uptake by plants. Because of the artefacts it introduces, alternative approaches have been developed that leave vegetation intact and separate soil and vegetation components of the flux by modelling (e.g. Boonman et al., 2024). For the CH<sub>4</sub> fluxes it may have resulted in serious underestimation of the fluxes. [Author: as mentioned below the chamber design did not allow vegetation to be present due to the small volume of the chamber relative to the high \(up to 100 cm\) vegetation at the site. We are aware of the underestimation of CH<sub>4</sub> fluxes we may have caused from the vegetation removal and address this bias throughout the text using some of the references suggested below.](#)

The statement that the fluxes after removal of the vegetation represent the 'net' soil greenhouse gas flux is invalid without specification what is actually meant by 'net flux', in particular when it is not explained which soil carbon pools are assumed to contribute to this net flux. It may at best approach the soil CO<sub>2</sub> flux (with an unknown error or bias) and likely severely underestimates the CH<sub>4</sub> flux. In general, CO<sub>2</sub> from the decomposition of recently produced labile carbon, and that from older soil carbon (e.g. the peat carbon pool) is difficult to separate in surface flux measurements. Vegetation removal does a poor job in that, because most the root mass often remains behind, will be active, and also affects the microbial population. [Author: we have in lines 136-137 now added that the net soil GHG flux we measure consists of heterotrophic respiration and autotrophic respiration of live roots from adjacent plants that were present below the collars.](#)

Besides these caveats, I also wonder if vegetation removal is a specific requirement of this automatic chamber system. Does vegetation hamper a leak-free placement of the chamber on the collars with this system?

[Author: as now detailed in lines 107-119 it was necessary to remove tall vegetation due to the limitations of the chamber system. We are fully aware that this is suboptimal and we address this now in the paper. However, all chamber systems are flawed and there will always be a trade-off. In our specific case we then focused on the relation of spatiotemporal variation of net soil fluxes to hydrological and thermal drivers.](#)

A motivation why this procedure has been applied, and a discussion of the caveats listed below is necessary. I suggest to do this in a separate Discussion section. Also, the vegetation removal procedure itself should be mentioned clearly in the abstract, for potential users to judge whether the data are suitable for use. [Author: Agree that more discussion on the impact of vegetation removal is needed, which was also raised by R2. Therefore, we have added text throughout the manuscript discussing this. However, we are reluctant to dedicate an entire section of the discussion on this as we are limited in quantifying the artefacts/biases of the vegetation removal on the fluxes, as we did not have an undisturbed control plot. We have included a section 2.1.1 Site preparation and disturbance \(lines 106-139\) under 2.1 Site description to present and discuss these concerns early in the manuscript as a prerequisite for the reader to interpret data presented later in the manuscript.](#)

Drawbacks of vegetation removal:

1. The soil greenhouse gas flux in an undisturbed ecosystem is the sum of all peat and other organic matter decomposition. The 'other' being various forms of recently produced, usually labile carbon, produced by the vegetation root system and litter decomposition. Removal or

decrease of one carbon pool may strongly affect the measured fluxes, in particular when it is not known quantitatively what has been removed. Furthermore, labile carbon interacts also with stable carbon decomposition via the priming effect. This may enhance stable carbon decomposition (e.g. peat decomposition) in the presence of labile carbon. Therefore, it should be specified which carbon pools are considered to be included in the flux measurements (peat, older humic matter, recently produced organic matter, labile or stable?), and what effects the measurement procedure has on CO<sub>2</sub> emission from these pools. If actual data collection, e.g. root mass, is not available, the authors could at least consult literature from other sites on that.

Authors: we have written in lines 109-112 the following: “The strategy was therefore to focus on measuring net soil GHG fluxes, where we assume the production of GHG are derived from heterotrophic respiration of older peat C/N, root exudated C/N from adjacent plants, dissolved N in groundwater and belowground autotrophic respiration from roots inhabiting the peat below the collars. We did not sample the live root mass in the peat below the collars and we are unsure how to include root data from other sites as this will also introduce uncertainty related to site specific differences in productivity and plant species. We hope that with this addition we can clarify to the reader what the main assumptions were and that we are aware of the potential caveats that need to be dealt with if using these data.

2. Glyphosate is known to affect soil faunal and soil microbial respiration (e.g. Nguyen et al., 2016). The application of this herbicide will have influenced the measured fluxes to an unknown extent. Authors: We have added a reference (Padilla & Selim 2020) to a paper addressing the half-life of glyphosate in soils. Overall, it shows that the half-life is short and we consider the direct effect of glyphosate to be small. Thus, we have added additional discussion on the potential effects on glyphosate on microbial activity and mention that in our case we cannot fully quantify the effect. Although, we only applied it once and not continuously and considering a short half-life in soils the direct effect is assumed to be small in our case.

3. As the need for very frequent removal of living vegetation during the experiment testifies, the root system in the soil remained active, producing labile carbon and adding a vegetation and labile carbon respiration component to the fluxes. Therefore, vegetation removal still does not remove vegetation effects. Author: agree. We have added that the fluxes also represent an autotrophic belowground component.

4. Since detection of CH<sub>4</sub> emissions is included, you are removing one of the main transport mechanisms of CH<sub>4</sub> from soil to atmosphere: the transport via plant aerenchyma (e.g. Vroom et al., 2022). Moreover, the main source of carbon for methanogens is labile carbon compounds produced by plant roots. The low CH<sub>4</sub> emissions therefore may be flawed and not represent normal ecosystem or soil CH<sub>4</sub> fluxes. On peat soils with approximately similar water table variation and vegetation, significant positive CH<sub>4</sub> fluxes were measured with manual and automated chambers (Hendriks et al., 2007; Lippmann et al., 2023). Author: Thank you for the relevant references to discuss the caveats regarding the CH<sub>4</sub> fluxes and vegetation. We have now specifically mentioned in lines 459-461 that we likely have limited CH<sub>4</sub> emissions due to removal of aboveground vegetation. This has also been restated in the conclusion. However, due to the presence of roots from adjacent vegetation it is likely the substrate supply remains and also the WTD was rather deep (20-40 cm) in the growing season, which would not necessarily favour high CH<sub>4</sub> production rates in the top soil in addition with the presence of major electron acceptors. We have added these discussion points to the text as well as the Vroom et al. 2022 paper.

Furthermore, you say that you removed vegetation with a minimum of 7 days. What was the (probably higher) vegetation removal frequency in the spring and summer period? This is highly important given the rapid vegetation regrowth in that part of the year. [Author: a 7 day interval was adequate to avoid regrowth. Furthermore, we never observed net CO<sub>2</sub> uptake in the growing season indicating that the vegetation removal was effective.](#)

Line 179: How does wind speed affect the operation of the system? How reliable is it at higher wind speeds? [Author: there will always be uncertainties under high wind speeds. However, provided that the chamber was equipped with a vent the adverse impact of wind was lowered. We did not observe more variable headspace gas concentration behaviour under strong winds, indicating that the vent was working properly. However, the SkyLine2D system was robust to wind movement and continued operation in all the wind regimes encountered at the site.](#)

Line 180: How certain can you be that rapid vegetation growth near the collar does not affect the airtight connection of chamber and collar? For instance, leaks may result from high grass getting between the chamber and the gasket during windy conditions. [Author: because vegetation was never allowed to grow above the collar. Combined with vegetation removal outside of the collar there was no opportunity for vegetation to get stuck in between the chamber seal and the collar.](#)

Line 182: If a fan was not installed in the chamber, what is the air flow provided by the main pump, and is it sufficient to flush the chamber? [Author: yes, as shown now in Figure S2 the mixing of the chamber was sufficient with the main pump. When fluxes became lower the headspace concentration also became more variable as is also seen with manual chambers.](#)

Figure 5: Can the upper photos be made sharper or larger, providing more detail on the chamber construction? Eventually, provide them in a supplement. [Author: Figure 5 has been moved to supplementary and is now called Figure S2. We have updated the figure with higher resolution photographs of panels A – C.](#)

Line 232: Check the sentence starting with “If the relative SE...”, the part “than 100%” appears to be misplaced. [Author: There was a typo and the text \(line 304-306\) has been corrected.](#)

Line 238: During the measurement time the temperature in the transparent chamber can rise in a matter of a minute in sunny weather. Is there no temperature sensor inside the chamber to detect this effect and correct for it? [Author: there was no temperature sensor inside the chamber. It is true that the headspace temperature can heat up, which would mainly impact the conversion of ppm to moles. However, the increase in temperature increases in theory the partial pressure of headspace gases, but the vent ensures a pressure buffer \(section 6 in Clough et al 2020; section 2.2.3 in Maier et al. 2022\). The temperature effect would be highest on non-linear behaviour of gases, but the use of HM accommodates for the non-linearity and estimates the slope at time zero. If the headspace concentrations behave linearly it must also be assumed that the temperature effect is negligible and hence do not impact flux estimates. There is also a theoretical possibility of a warmer headspace heats up the soil below the chamber, but given that flux measurement duration was only 5 minutes it is unlikely that the soil would be heated up. In conclusion, despite we did not measure the temperature we do not see a need correcting for increased chamber headspace temperature as 1\) the chamber was vented alleviating temperature induced pressure changes and 2\) the short measurement duration prevented any temperature increase to extend into the soil and change biological processes.](#)

Caption Fig. 7. Good point, but how sensitive is the system to bubble fluxes induced by the chamber lowering? Was the collar anchored somehow in the subsoil of the ditch to prevent disturbance? [Author: It has been added in the text that the collar was glued on top of a longer perforated tube that was anchored in the bottom of the ditch. In lines 346-348 we describe that if bubbles were monitored 30 seconds after chamber closure it would be an indication of mechanical disturbance and this flux would be discarded.](#)

Line 383: variability in soil water content. Again, it is disappointing that so few soil data is included. Could there be differences in water seepage from higher ground (which is to be expected given the topography) or does soil cracking in dry periods occur, influencing the SWC? [Author: we have now included peat soil characteristics. The peat characteristics are relatively homogeneous across the transect and we never observed soil cracking at this site.](#)

Line 398 – 402. Again, the large spatial variability should be no surprise. Unfortunately, any information on soil variability is missing. For instance, I would have expected information on the soil carbon content, which is an important predicting variable in CO<sub>2</sub> fluxes from soils. Although the above-ground vegetation is removed, there is still root mass present that produces labile carbon; root density also adds to the spatial variability. This kind of data would be very useful for other users of the data. [Author: according to the peat soil data presented now in table 1 indicates little spatial variation in TC and TN. We do not have data on labile carbon pools from roots, but we agree this would have been very useful.](#)

Line 424. Interesting to see these bursts. As mentioned above, this could also be an artefact of your methodology. It excludes plant emissions, which is usually a major CH<sub>4</sub> emission pathway (Vroom et al., 2002). By artificially removing the plant flux, a buildup of CH<sub>4</sub> concentration in the soil could induce a burst-like emission pattern. [Author: yes, the burst-like emission patterns are most likely due to CH<sub>4</sub> concentration buildup that is not “vented” by the plants. This mechanism has been added to the text.](#)

Figure 16 and Figure 19. This figure is difficult to understand, information in the caption is ambiguous. [Author: agree. We have clarified the caption for these figures. Note that they have been given new numbers, Fig. 16 → Fig. 11 and Fig. 19 → Fig. 14.](#)

You have only 5 measurement points per day, but there are more observation points. The caption suggests that the points are based on a grouping of all soil collars together. Is this over one day, if so, which days? Or over an entire month, as the reference to the figure legend suggests? In that case I would have expected way more data points in the figure, unless it is a monthly average per collar. In short, be clear how your data have been grouped. This is also important for understanding sources of variation in the data. Grouping of all collars in one day introduces also spatial variation, next to temporal variation. [Author: yes, you are right. We assigned each flux observation to the hour of the day \(e.g. between 1 – 24\) and averaged these per month. This is now written in the caption.](#)

Next, the colour scale of the legend is not very distinctive by choosing only shades of blue and red. Better include other colours as well, which makes the data from different months more distinctive. [Author: the colours for the different months were chosen to indicate that blue is colder and red is warmer. Initially, we did try different color schemes, but they did not work and just created more visual confusion in our opinion. To help the reader distinguish between the different months \(e.g. colours\) we added in small text the month abbreviation right of the LOESS](#)

curves. If the manuscript is accepted for publication a high-resolution version of this figure will be available.

Line 443-444. The lack of diurnal variation for CH<sub>4</sub> may also have been caused by removing the vegetation. Plant fluxes of CH<sub>4</sub> tend to have diurnal variation, driven by solar radiation (Vroom et al., 2022). *Author: we agree with this and have added further details and citations in lines 568-577.*

Line 540. 'it cannot be ruled out that living roots inhabited the soil below the chambers'. You can be quite sure about that if you have to clip the vegetation frequently! *Author: yes. We have included more reflections throughout the text on this and how it impacted fluxes.*

Line 547-550. There could be other electron acceptors inhibiting methanogenesis, for instance Fe<sup>3+</sup>, sulfate. Here again, some information on basic soil and water chemistry could have been helpful for users of the data. *Author: we have now added groundwater chemistry data including major electron acceptors. We also added some discussion on how it may impact CH<sub>4</sub> fluxes in lines 469-471 and lines 672-674. Indeed the presence of both SO<sub>4</sub><sup>2-</sup> and NO<sub>3</sub><sup>-</sup> as well as Fe indicate that there are enough electron acceptors to prevent methanogenesis to happen.*

Table 3. Mention the source of the GWP factors used here. *Author: we have added this reference*

Section 5 Conclusions: The causes for spatial variability of the GHG fluxes is unresolved – but that is not surprising given that any information on soil variability is lacking. Fig. 15 suggests that the spatial variability is larger than the temporal variability on these closely spaced collars, which would be an interesting conclusion. *Author: we have expanded this sentence in line 646-649: “ The cause for the spatial variability of GHG fluxes remains unresolved and do not clearly link directly to either WTD, soil temperature and soil/groundwater chemical parameters. Interestingly it appears that the temporal variability of GHG fluxes across the transect is lower than the spatial variation.”*

Line 578-580: The low CH<sub>4</sub> emission is attributed to low water table and a cold wet winter. However, the huge elephant in the room here is the potential effect of vegetation removal on the CH<sub>4</sub> fluxes detailed above. At other peat sites with similar water table and vegetation that I have measured myself, persistent positive summer CH<sub>4</sub> fluxes occurred (Hendriks et al., 2007; Lippmann et al., 2023). Neither, alternative explanations for the low emissions are considered, such as the presence of other anaerobic electron acceptors (e.g. sulfate reduction) that maintain a too high redox potential for methanogenesis? This is mentioned elsewhere in the article for NO<sub>3</sub><sup>-</sup>, but not considered here. *Author: we agree with this comment and have added to the conclusion (line 674-676): “However, it cannot be ruled out that the vegetation removal impeded CH<sub>4</sub> emissions, as we effectively restricted plant mediated CH<sub>4</sub> emissions. Therefore, caution should be taken when comparing the CH<sub>4</sub> flux data to other drained peatlands. Furthermore, electron acceptors present in groundwater suggest that redox potential may have been too high to sustain CH<sub>4</sub> production.”*

### **Supplement.**

Missing: collar numbers at each graph. What do the ticks on the horizontal axis represent? First day of each month, midpoint? Day numbers would be more informative on the horizontal axis! *Author: Collar numbers have been added to each graph. It has also been added in the description of this Figure S4 that the tick marks represent the 1<sup>st</sup> day of each month.*

### **Data.**

The data representation is largely correct. However, for greenhouse gas fluxes it would be useful include the standard error of the flux calculation method that is applied. This would allow data users to apply additional quality checks. Author: agree the standard error of the slope estimate (ppm s<sup>-1</sup>) has been added to each flux in the data file “VB GHG fluxes Figures 9 - 15.xlsx”

## References.

Boonman, J., et al. (2024): Transparent automated CO<sub>2</sub> flux chambers reveal spatial and temporal patterns of net carbon fluxes from managed peatlands. *Ecological Indicators*, 164, 112121.

Hendriks et al., (2007): The full greenhouse gas balance of an abandoned peat meadow. *Biogeosciences*, 4(3), 411-424

Lippmann et al. (2023): Peatland-VU-NUCOM (PVN 1.0): using dynamic plant functional types to model peatland vegetation, CH<sub>4</sub>, and CO<sub>2</sub> emissions. *Geoscientific Model Development*, 16(22), 6773-6804.

Nguyen et al. (2016): Impact of glyphosate on soil microbial biomass and respiration: a meta-analysis. *Soil Biology and Biochemistry*, 92, 50-57.).

Vroom et al., (2022): Physiological processes affecting methane transport by wetland vegetation, *Aquatic Botany* 182:10354

Author: thank you for pointing our attention to these relevant references. We have used the Boonman et al to highlight the use of automated chambers in peatland research. Nguyen et al. to address the glyphosate issue and Vroom et al. to frame the results in relation to plant mediated CH<sub>4</sub> fluxes

Author: References used in this reply

Brændholt, A., Steenberg Larsen, K., Ibrom, A., & Pilegaard, K. (2017). Overestimation of closed-chamber soil CO<sub>2</sub> effluxes at low atmospheric turbulence. *Biogeosciences*, 14(6), 1603–1616. <https://doi.org/10.5194/bg-14-1603-2017>

Padilla, J. T., & Selim, H. M. (2020). Environmental behavior of glyphosate in soils. *Advances in Agronomy*, 159, 1–34. <https://doi.org/10.1016/BS.AGRON.2019.07.005>

Clough, T. J., Rochette, P., Thomas, S. M., Pihlatie, M., Christiansen, J. R., & Thorman, R. E. (2020). Global Research Alliance N<sub>2</sub>O chamber methodology guidelines: Design considerations. *Journal of Environmental Quality*, jeq2.20117. <https://doi.org/10.1002/jeq2.20117>

Maier, M., Weber, T. K. D., Fiedler, J., Fuß, R., Glatzel, S., Huth, V., Jordan, S., Jurasinski, G., Kutzbach, L., Schäfer, K., Weymann, D., & Hagemann, U. (2022). Introduction of a guideline for measurements of greenhouse gas fluxes from soils using non-steady-state chambers. *Journal of Plant Nutrition and Soil Science*, 185(4), 447–461. <https://doi.org/10.1002/jpln.202200199>
